# Supplementary material for: Patient-Oriented Research Competencies in Health (PORCH) for patients, healthcare providers, decision-makers and researchers: protocol of a scoping review
Source: Springer Nature journal article supplement (doi:10.1186/s13643-018-0762-1), 2018-07-19
Supplement: MOESM4 [file 15964278]

## **Additional File 4 – Academic Databases**

### **Health Sciences**

- MEDLINE (Ovid)
- Embase (Ovid)
- Cochrane Database of Systematic Reviews (Ovid)
- Cochrane Central Register of Controlled Trials (Ovid)
- CINAHL (EBSCO)
- LILACS
- Native Health Database
- Arctic Health Publications
- Health Reference Center
- Health Technology Assessment
- Elsevier ScienceDirect
- TRIP

### **Social Sciences**

- Studies on Women & Gender Abstracts
- Ageline
- Social Work Abstracts
- PsycINFO
- Sociological Abstracts

### **General**

- Web of Science Core Collection
- Academic Search Complete

### **Theses**

- ProQuest Dissertations & Theses Global
- Theses Portal Canada
- British Library EThOS
- National Library of Australia's Trove service

### **Conference Proceedings**

- Web of Science
- Embase (Ovid)
- WorldCat (PapersFirst, ProceedingsFirst)
