# Supplementary material for: Patient-Oriented Research Competencies in Health (PORCH) for patients, healthcare providers, decision-makers and researchers: protocol of a scoping review
Source: Springer Nature journal article supplement (doi:10.1186/s13643-018-0762-1), 2018-07-19
Supplement: MOESM5 [file 15964278]

### **Additional File 5 – Hand Search Journals**

- Health Services Research
- Health Research Policy and Systems
- Health Policy
- Lancet
- The Patient
- Health Expectations
- Value in health
- Medical Anthropology Quarterly
- Social Science and Medicine
- Culture Medicine and Psychiatry
- Anthropology and Medicine
- Sociology of Health and Illness
