# Supplementary material for: Patient-Oriented Research Competencies in Health (PORCH) for patients, healthcare providers, decision-makers and researchers: protocol of a scoping review
Source: Springer Nature journal article supplement (doi:10.1186/s13643-018-0762-1), 2018-07-19
Supplement: MOESM7 [file 15964278]

**Additional File 7 – Data Extraction Form**

|                                   |                                                                                                                                |
|-----------------------------------|--------------------------------------------------------------------------------------------------------------------------------|
| Reviewer:                         |                                                                                                                                |
| Date:                             |                                                                                                                                |
| <b>Publication Information</b>    |                                                                                                                                |
| Study unique ID:                  |                                                                                                                                |
| 1 <sup>st</sup> Author's Name:    |                                                                                                                                |
| Publication Year:                 | Mainly between 1990-2017                                                                                                       |
| Journal:                          |                                                                                                                                |
| Country:                          |                                                                                                                                |
| Language written:                 | English, French, Other                                                                                                         |
| <b>Study design</b>               |                                                                                                                                |
| Population/Sample:                | Demographics, Not applicable                                                                                                   |
| Stakeholder group:                | Patient, healthcare provider, decision-maker, researcher                                                                       |
| Methodology & methods:            | Qualitative (QL), quantitative (QN), mixed methods (MM), not applicable (e.g., grey literature)                                |
| Knowledge synthesis:              | Systematic review, scoping review, etc.                                                                                        |
| Brief review:                     | Conference proceedings, etc.                                                                                                   |
| Grey literature:                  | Editorial, commentary, etc.                                                                                                    |
| Theoretical framework:            | Yes (specify), None                                                                                                            |
| <b>Context</b>                    |                                                                                                                                |
| Level of involvement in research: | Consultation; Collaboration (in governance, priority setting, conducting research, conducting KT activities); Publicly led POR |
| Setting:                          | Community, acute care, long-term care, etc.                                                                                    |
| Funding sources:                  |                                                                                                                                |
| <b>Concepts</b>                   |                                                                                                                                |
| Competencies:                     | Knowledge, skills, attitudes (e.g., on communication, collaboration)                                                           |
| POR or similar:                   | Patient-reported outcomes, patient-centered care, etc.                                                                         |
| <b>POR competencies</b>           |                                                                                                                                |
| Knowledge (specify):              | <ul style="list-style-type: none"> <li>•</li> <li>•</li> <li>•</li> </ul>                                                      |
| Skills (specify):                 | <ul style="list-style-type: none"> <li>•</li> <li>•</li> <li>•</li> </ul>                                                      |
| Attitudes (specify):              | <ul style="list-style-type: none"> <li>•</li> <li>•</li> <li>•</li> </ul>                                                      |
| Other (specify):                  | <ul style="list-style-type: none"> <li>•</li> <li>•</li> <li>•</li> </ul>                                                      |

| <b>Study Results/Findings</b>                               |                                                                                                                                                                                                              |
|-------------------------------------------------------------|--------------------------------------------------------------------------------------------------------------------------------------------------------------------------------------------------------------|
| Main/Primary findings per each stakeholder group (specify): | Relevant to Decision-making/Policy: <ul style="list-style-type: none"> <li>•</li> <li>•</li> <li>•</li> </ul> Relevant to Practice <ul style="list-style-type: none"> <li>•</li> <li>•</li> <li>•</li> </ul> |
| Secondary findings per stakeholder group (specify):         | Relevant to Education <ul style="list-style-type: none"> <li>•</li> <li>•</li> <li>•</li> </ul> Relevant to Research <ul style="list-style-type: none"> <li>•</li> <li>•</li> <li>•</li> </ul>               |
| Other findings (specify):                                   | <ul style="list-style-type: none"> <li>•</li> <li>•</li> <li>•</li> </ul>                                                                                                                                    |
| <b>Conclusion</b>                                           |                                                                                                                                                                                                              |
| Include:                                                    |                                                                                                                                                                                                              |
| Exclude (provide rationale):                                |                                                                                                                                                                                                              |
| Additional Comments:                                        |                                                                                                                                                                                                              |
